# Supplementary material for: Evaluating Eucalyptus leaf colonization by Brasilonema octagenarum (Cyanobacteria, Scytonemataceae) using in planta experiments and genomics
Source: PeerJ. 2020 May 27;8:e9158. doi: 10.7717/peerj.9158 (PMC7261140; doi:10.7717/peerj.9158)
Supplement: Supplemental Information 1 — Raw data from which Tables 1 and 2 were produced. [file peerj-08-9158-s003.xlsx]

## Sheet: Plan1
Treatment	Chlorophyll a	Chlorophyll b	Carotenoids	Cla/Clb ratio	Root dry weight	Leaf dry weight	Stem dry weight	Leaf area	Stem height
control	14.3894	6.1057	3.09829	2.35672	16.632	21.253	25.187	42141	89.5
control	15.2851	8.15951	2.72748	1.87329	17.047	28.381	24.376	40068	84.2
control	16.8155	6.77189	3.30925	2.48313	15.632	15.965	22.11	29168	80
control	16.7296	6.4142	3.62342	2.60821	12.805	24.107	26.007	42252	82
control	15.8431	6.59854	2.11431	2.401	13.97	18.173	21.01	29979	82
control	14.8174	6.63537	3.02671	2.23309	14.925	19.442	19.763	31582	82.5
innoculated	14.4467	7.42346	4.36951	1.94609	20.203	21.823	25.181	3582.6	92.5
innoculated	12.6013	6.42027	2.48031	1.96274	15.573	21.758	27.648	4357	86
innoculated	14.644	8.47055	2.57984	1.72881	18.689	23.809	30.84	4461.1	93.5
innoculated	14.1842	6.57391	2.5396	2.15765	15.942	21.159	26.543	4035.5	86
innoculated	15.9055	7.67418	3.01007	2.07261	18.594	22.12	28.538	4488.5	89
innoculated	14.8985	7.97842	2.62903	1.86735	18.697	24.134	31.413	3894.4	90
control average	15.6467	6.78087	2.98324	2.32591	15.1685	21.2202	23.0755	35865	83.3667
innoculated average	14.4467	7.42346	2.93473	1.95588	17.9497	22.4672	28.3605	4136.52	89.5
