# Supplementary material for: Evaluating Eucalyptus leaf colonization by Brasilonema octagenarum (Cyanobacteria, Scytonemataceae) using in planta experiments and genomics
Source: PeerJ. 2020 May 27;8:e9158. doi: 10.7717/peerj.9158 (PMC7261140; doi:10.7717/peerj.9158)
Supplement: Table S1 [file peerj-08-9158-s001.xls]

## Sheet: 1
Supplementary Table 1: Virulence factors synthesized by phypathogens with similarity to proteins encoded in Brasilonema genomes, including effects of deleterious mutations on the pathogenicity of the microorganisms that produced them.
UniProt Accession	Protein	Function	Pathogen	Target	Mutant	Possible Role in Primary Metabolism	UFV-E1	CENA114	UFV-OR1	SPC 951	UFV-L1	Observations
A0A0K0GHK1	SreR	two-component system regulation	Xanthomonas oryzae	leaf	unaffected pathogenicity	no	+	+	+	+	+
A0A0K0GI30	DetR	two-component system cytoplasmic signaling	Xanthomonas oryzae	leaf	reduced virulence	no	+	+	+	+	+
A0A0U1YU79	PilT	twitching motility	Pantoea ananatis	leaf	reduced virulence	no	+	+	+	+	+
A4K9H6	PhoP	two-component system regulation	Xanthomonas oryzae	undefined	reduced virulence	no	+	+	+	+	+
A4QUT2	CPXB	catalase-peroxidase	Magnaporthe oryzae	seedling, leaf	unaffected pathogenicity	no	+	+	+	–	–
B0LFQ7	Bx-Prx	reproduction and pathogenicity	Bursaphelenchus xylophilus	leaf, cone	loss of pathogenicity	no	+	+	+	+	+
C5A846	PidR	two-component system regulation	Burkholderia glumae	panicle	reduced virulence	no	+	+	+	+	+
C5A9K4	AroB	3-dehydroquinate synthase	Burkholderia glumae	panicle	reduced virulence	yes	+	+	+	–	+
D4HUY4	YhbH	ribosome-associated modulation protein	Erwinia amylovora	fruit, shoot	loss of pathogenicity	no	+	+	+	+	+	alignment in just a subset of the corresponding CDS
D4HX24	RpoS	regulation of stress and starvation response	Erwinia amylovora	fruit	reduced virulence / unaffected pathogenicity	no	–	–	–	+	+
D4HXR8	AcrD	resistance-nodulation-cell division transport	Erwinia amylovora	fruit, root	unaffected pathogenicity	no	+	+	+	+	+
D4I307	ArgD	N-acetylornithine aminotransferase	Erwinia amylovora	shoot, fruit	loss of pathogenicity / reduced virulence	yes	+	+	–	–	+
F5HCK8	IPMDH	3-isopropylmalate dehydrogenase	Parastagonospora nodorum	undefined	loss of pathogenicity	yes	+	+	+	+	+
G4ML75	MET6	methyltetrahydropteroyltriglutamate-homocysteine S-methyltransferase	Magnaporthe oryzae	leaf	loss of pathogenicity	yes	+	+	+	–	–
G4MTK2	MoARG1	arginine biosynthesis	Magnaporthe oryzae	leaf	loss of pathogenicity	yes	+	+	+	+	+
G4MXC5	MoPRX1	peroxiredoxin peroxidase	Magnaporthe oryzae	leaf	reduced virulence	no	+	+	+	+	+
G4N4N6	MoSFA1	S-(hydroxymethyl)glutathione dehydrogenase	Magnaporthe oryzae	leaf	reduced virulence	no	+	+	+	+	+
G4NCL5	MGG_00383	hypothetical protein	Magnaporthe oryzae	undefined	reduced virulence	no	+	+	+	+	+
I1RSU2	PKS9/KSA1	polyketide synthase	Fusarium graminearum	undefined	unaffected pathogenicity	no	+	+	+	+	–
P87025	THR1	reductase	Colletotrichum lagenaria	undefined	reduced virulence	no	–	–	–	+	+
Q12634	BUF/BUF1	undefined	Magnaporthe oryzae	leaf	loss of pathogenicity	no	+	+	+	+	+
Q2LK92	BcPIC5/BcFKBP12	rapamycin sensitivity	Botrytis cinerea	berry, cotyledon, fruit	reduced virulence / unaffected pathogenicity / hypervirulence	no	+	+	+	+	+	alignment in just a subset of the corresponding CDS
Q4UQD0	XC_3703	cyclic di-GMP effector	Xanthomonas campestris	leaf	effector / reduced virulence	no	+	+	+	–	+
Q4UTV7	XC_2466	aspartate alpha-decarboxylase	Xanthomonas campestris	leaf	reduced virulence	yes	+	+	+	+	+
Q4UUL4	XC_2203	nucleotide diphosphate kinase	Xanthomonas campestris	leaf	reduced virulence	yes	+	+	+	+	+
Q58PW8	HsvA	hrp-associated systemic virulence	Erwinia amylovora	fruit, shoot	reduced virulence / unaffected pathogenicity	no	–	–	–	–	+
Q5H3K9	ColR	undefined	Xanthomonas oryzae	leaf	reduced virulence	no	+	+	+	+	+
Q6RKH3	PKS7	polyketide synthase	Fusarium graminearum	undefined	unaffected pathogenicity	no	+	+	+	–	+	alignment in just a subset of the corresponding CDS
Q6RKH4	PKS6	polyketide synthase	Fusarium graminearum	undefined	unaffected pathogenicity	no	+	+	+	–	+	alignment in just a subset of the corresponding CDS
Q6RKH5	PKS5	polyketide synthase	Fusarium graminearum	undefined	unaffected pathogenicity	no	+	+	+	–	–	alignment in just a subset of the corresponding CDS
Q7WTQ9	AcrB	multidrug efflux pump	Erwinia amylovora	leaf	reduced virulence	no	+	+	+	+	+
Q8PM59	PstB	phosphate metabolism	Xanthomonas citri	leaf	loss of pathogenicity	no	+	+	+	+	+
Q8XSV8	FabG2	3-ketoacyl-acyl carrier protein reductase	Ralstonia solanacearum	undefined	reduced virulence	yes	+	+	+	+	+
Q8Y0J2	FabG1	3-ketoacyl-acyl carrier protein reductase	Ralstonia solanacearum	undefined	lethal	yes	+	+	+	+	+
Q9C1T0	ARG1	argininosuccinate lyase	Fusarium oxysporum	undefined	reduced virulence	yes	+	+	+	+	+
Q9UWF0	CAM	undefined	Magnaporthe oryzae	leaf	reduced virulence / loss of pathogenicity	no	–	–	–	–	+
